# Supplementary material
Source: publisher site journal article supplement (https://www.spandidos-publications.com/5334/downloadSupplementary)

Figure S1. The pharmacological inhibition of cSrc interferes with the effect of P4 on glioblastoma cell migration. Representative images of U87 wound healing assays. Cells were treated with P4 (50 nM), PP2 (1  $\mu$ M) or the P4 + PP2 conjunct treatment at 0, 6, 12 and 24 h. P4, progesterone; V, vehicle (DMSO 0.001%); PP2, 1-tert-Butyl-3-(4-chlorophenyl)-1H-pyrazolo[3,4-d]pyrimidin-4-amine; cSrc, proto-oncogene tyrosine-protein kinase Src.

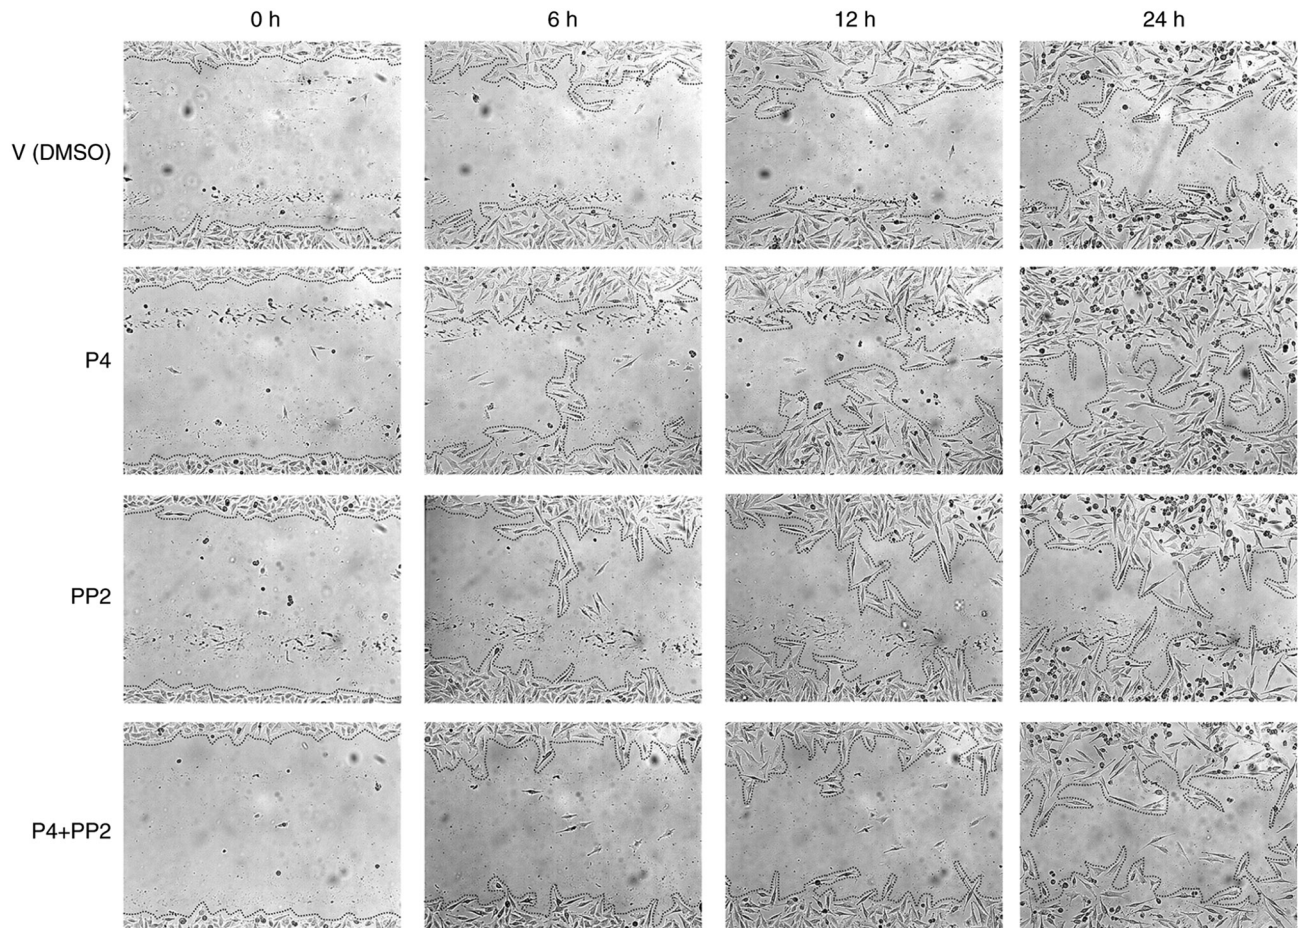

Figure S2. cSrc inhibition blocks the effect of 3 $\alpha$ -THP on glioblastoma cell migration. Representative images of wound healing assays of U87 cells treated with 3 $\alpha$ -THP (100 nM), PP2 (1  $\mu$ M) or the 3 $\alpha$ -THP + PP2 conjunct treatment at 0, 6, 12 and 24 h. EtOH, ethanol; V, vehicle (EtOH 0.01% or DMSO 0.001%); 3 $\alpha$ -THP, allopregnanolone; PP2, 1-tert-Butyl-3-(4-chlorophenyl)-1 H-pyrazolo[3,4-d] pyrimidin-4-amine; cSrc, proto-oncogene tyrosine-protein kinase Src.

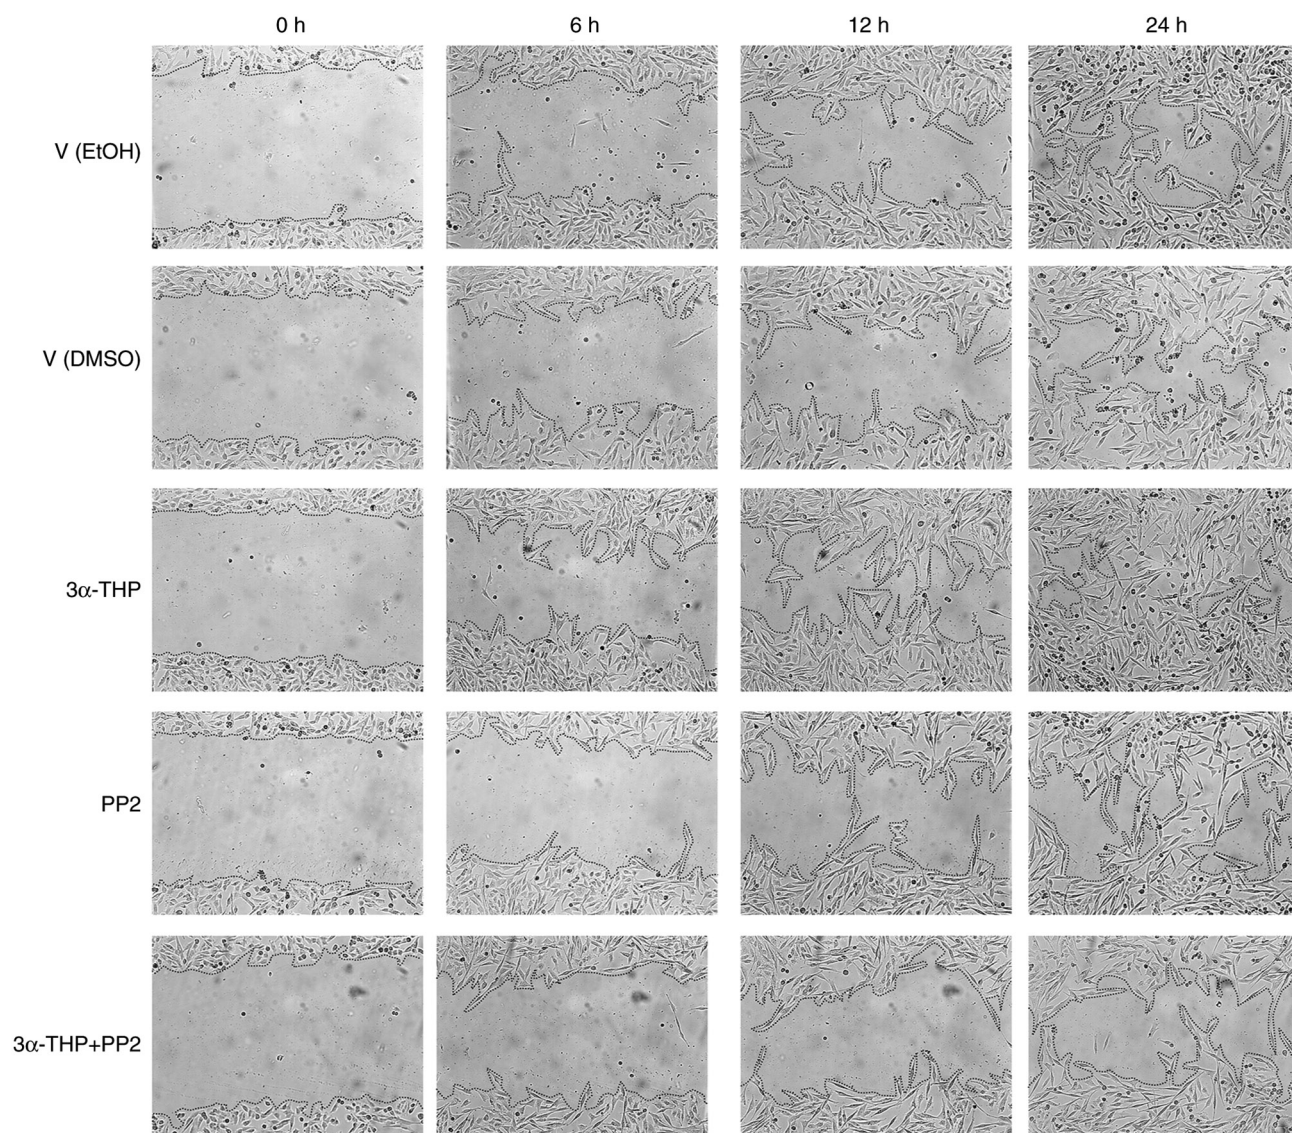



Figure S3. Senescence is not induced by P4 or PP2 in the U251 human glioblastoma cell line. U251 cells were treated with P4 (50 nM), PP2 (1  $\mu$ M), the P4 + PP2 conjunct treatment or V (0.01% DMSO), and  $\beta$ -galactosidase staining was performed. Representative images of the senescence assays are shown. P4, progesterone; V, vehicle; PP2, 1-tert-Butyl-3-(4-chlorophenyl)-1H-pyrazolo[3,4-d] pyrimidin-4-amine.

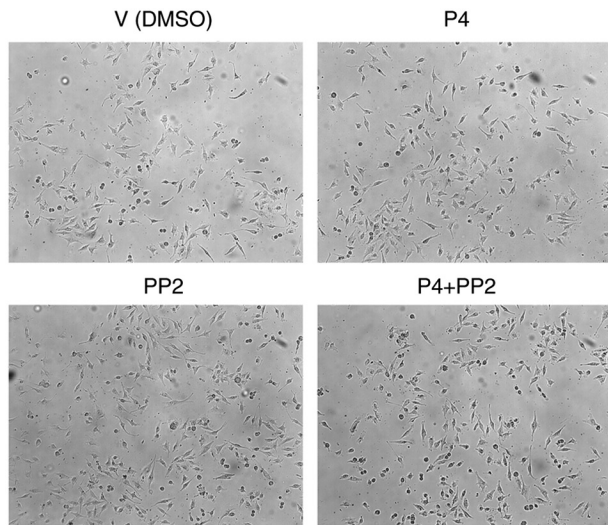

Figure S4. Senescence is not induced by 3 $\alpha$ -THP or PP2 in the U251 human glioblastoma cell line. U251 cells were treated with 3 $\alpha$ -THP (100 nM), PP2 (1  $\mu$ M), the 3 $\alpha$ -THP + PP2 conjunct treatment or V (0.01% EtOH or 0.01% DMSO) and  $\beta$ -galactosidase staining was performed. Representative images of senescence assays are shown. EtOH, ethanol; V, vehicle; PP2, 1-tert-Butyl-3-(4-chlorophenyl)-1H-pyrazolo [3,4-d] pyrimidin-4-amine.

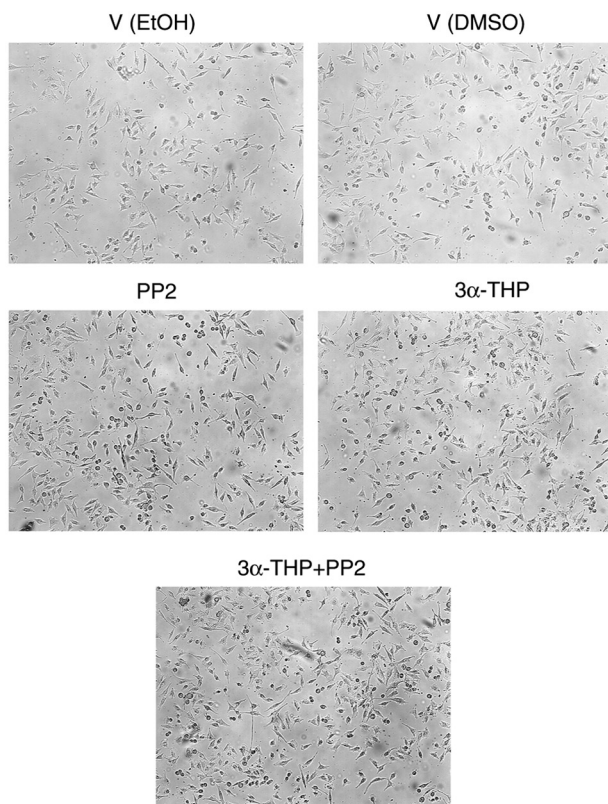

Figure S5. Senescence is not induced by P4 or PP2 in the U87 human glioblastoma cell line. U87 cells were treated with P4 (50 nM), PP2 (1  $\mu$ M), the P4+PP2 conjunct treatment or V (0.01% DMSO), and  $\beta$ -galactosidase staining was performed. (A) Representative images of senescence assays. (B) Graph of the percentage of cells with  $\beta$ -galactosidase staining. Each column represents the mean  $\pm$  SEM; n=3. P4, progesterone; V, vehicle; PP2, 1-tert-Butyl-3-(4-chlorophenyl)-1H-pyrazolo[3,4-d]pyrimidin-4-amine.

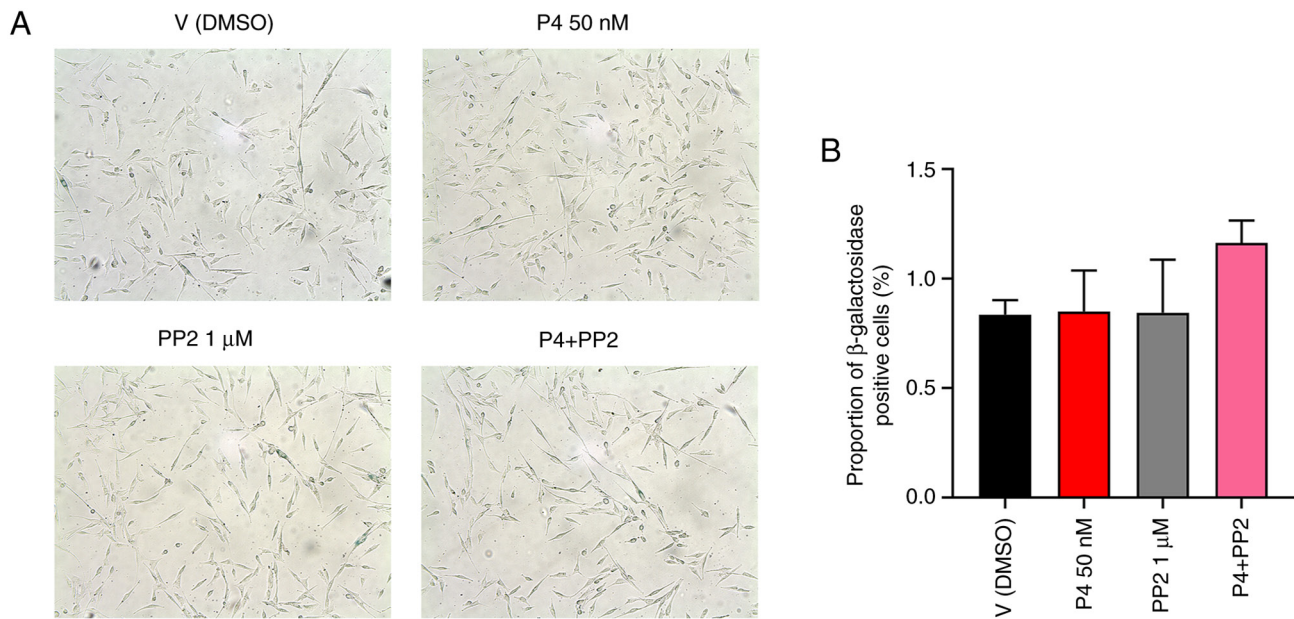

Figure S6. Senescence is not induced by 3 $\alpha$ -THP or PP2 in the U87 human glioblastoma cell line. U87 cells were treated with 3 $\alpha$ -THP (100 nM), PP2 (1  $\mu$ M), the 3 $\alpha$ -THP+PP conjunct treatment or V (0.01 % DMSO for PP2, 0.01 % EtOH for 3 $\alpha$ -THP), and  $\beta$ -galactosidase staining was performed. (A) Representative images of senescence assays. (B) Graph of the percentage of cells with  $\beta$ -galactosidase staining. Each column represents the mean  $\pm$  SEM; n=3. EtOH, ethanol; V, vehicle; 3 $\alpha$ -THP, allopregnanolone; PP2, 1-tert-Butyl-3-(4-chlorophenyl)-1H-pyrazolo[3,4-d] pyrimidin-4-amine.

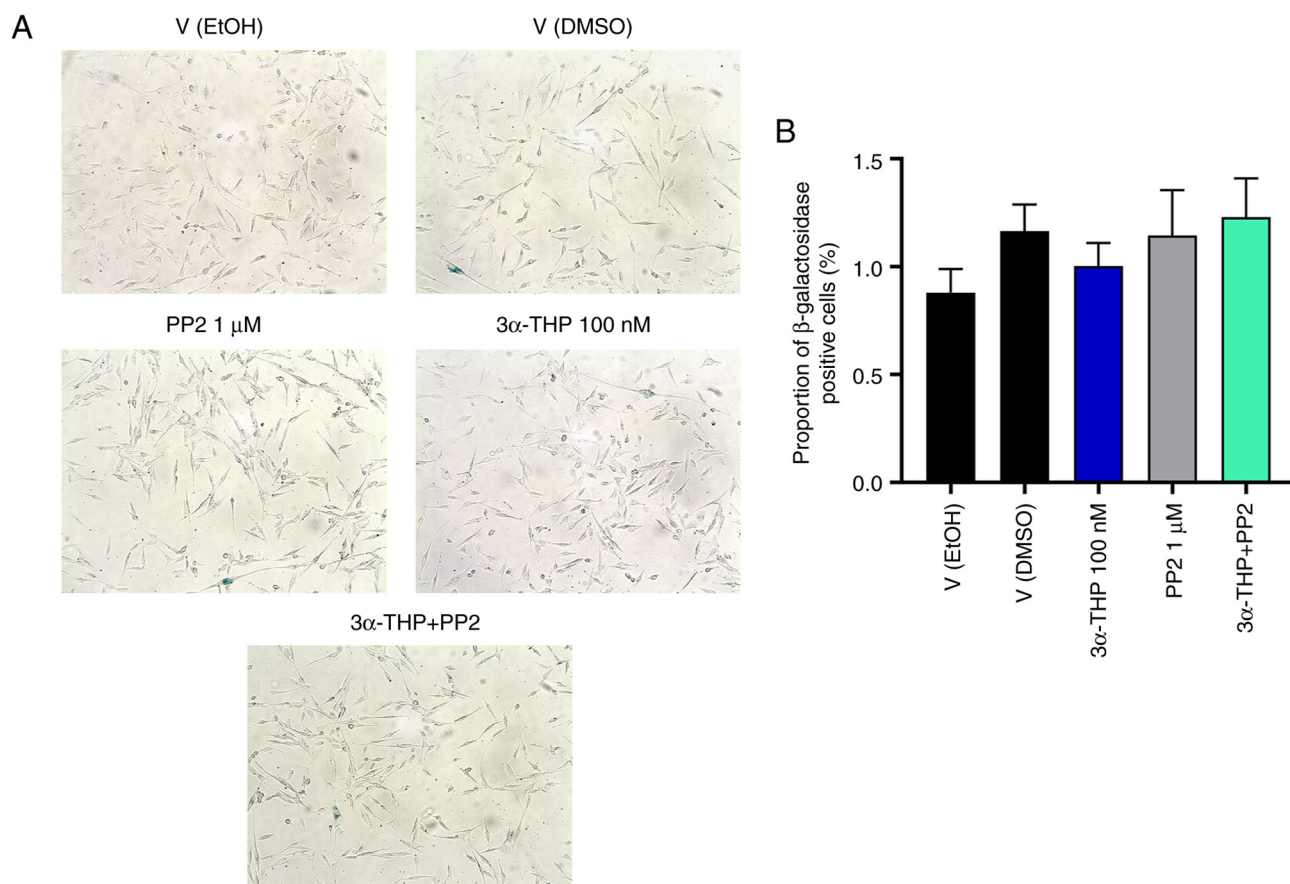

Supplement: Supplementary file 1 [file downloadSupplementary]
